# Supplementary material for: Vascularized tissue on mesh-assisted platform (VT-MAP): a novel approach for diverse organoid size culture and tailored cancer drug response analysis
Source: Royal Society of Chemistry journal article supplement (doi:10.1039/d3lc01055d), 2024-01-01
Supplement: d3lc01055d1.pdf [file d3lc01055d1.pdf]

(a)

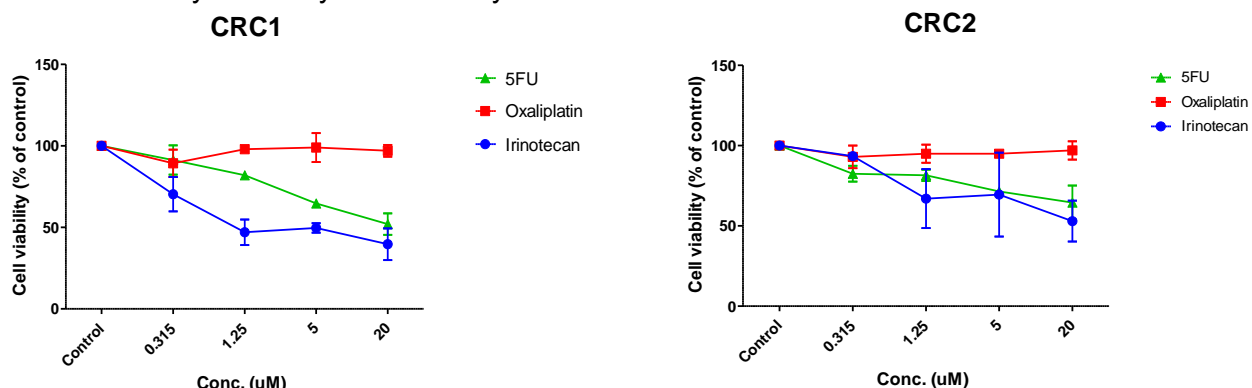

(b)

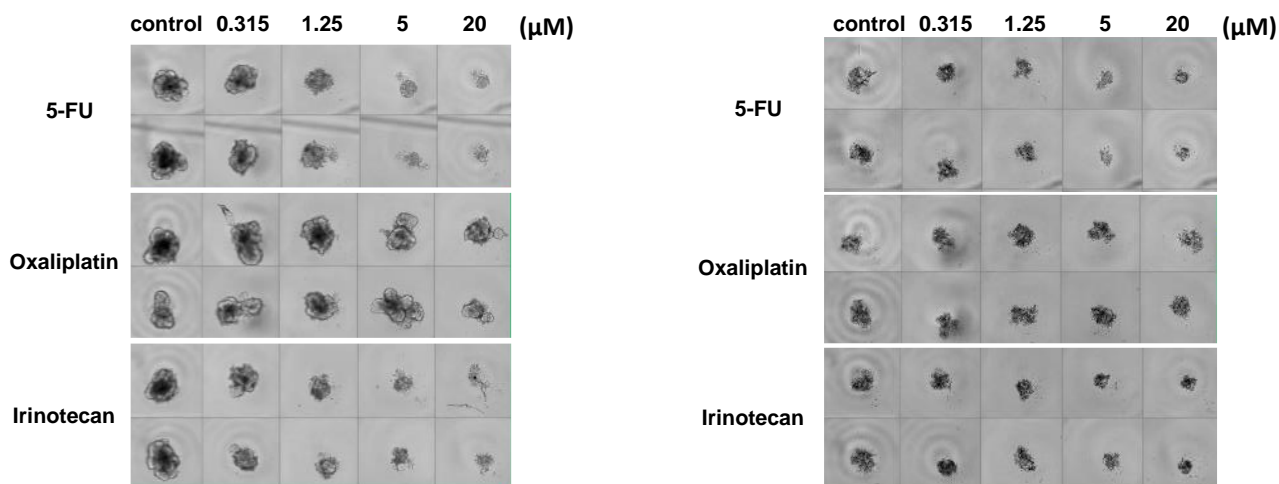

**S. Figure 1. Cell viability and microscope images of CRC 1 and CRC 2 with drug treatment.** (a) Dose-Response Curves for CRC 1 and CRC 2 exposed to varying concentrations of 5-FU, Oxaliplatin, and Irinotecan. (b) Microscope images of CRC 1 and CRC 2's response to different drug treatments.

(a)

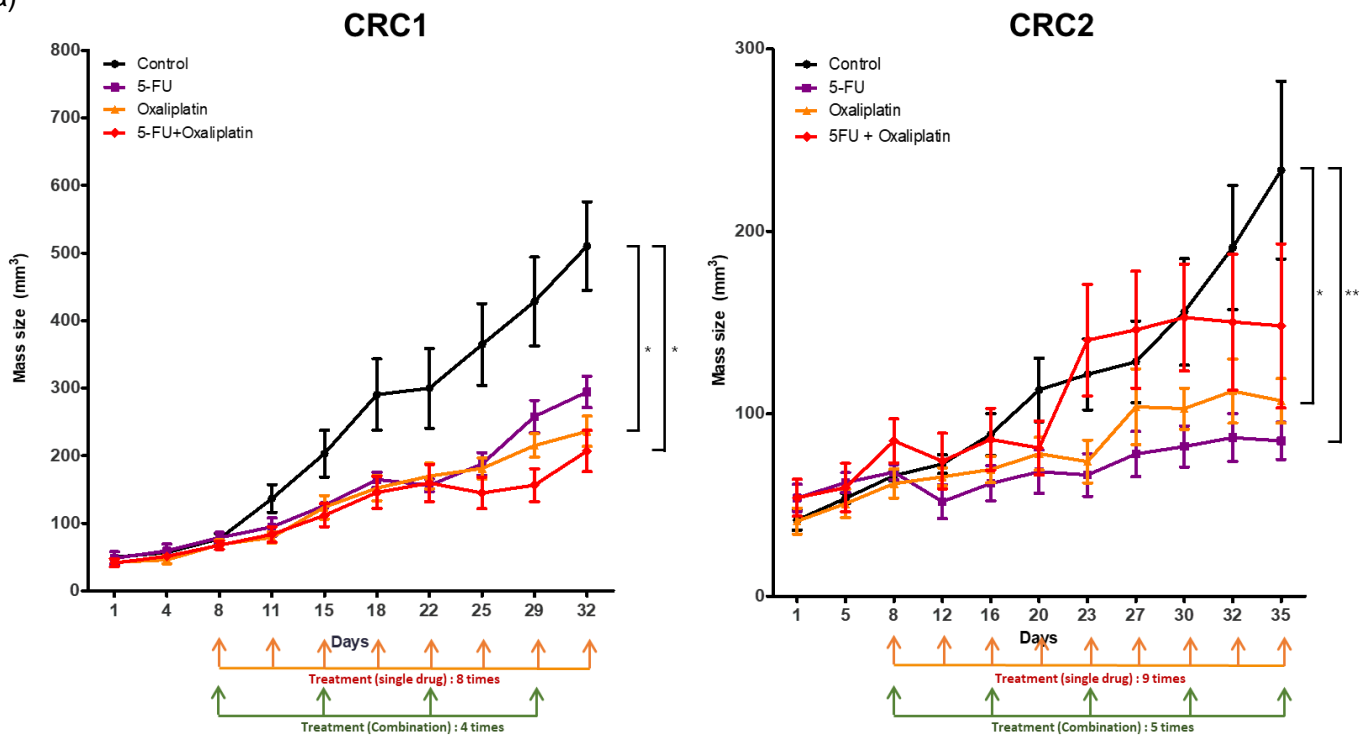

**S. Figure 2. Size variability in CRC 1 and CRC 2 over a 32-Day period drug treatment.** 5-Fu, Oxaliplatin and combination of 5-Fu + Oxaliplatin were treated during experiments.

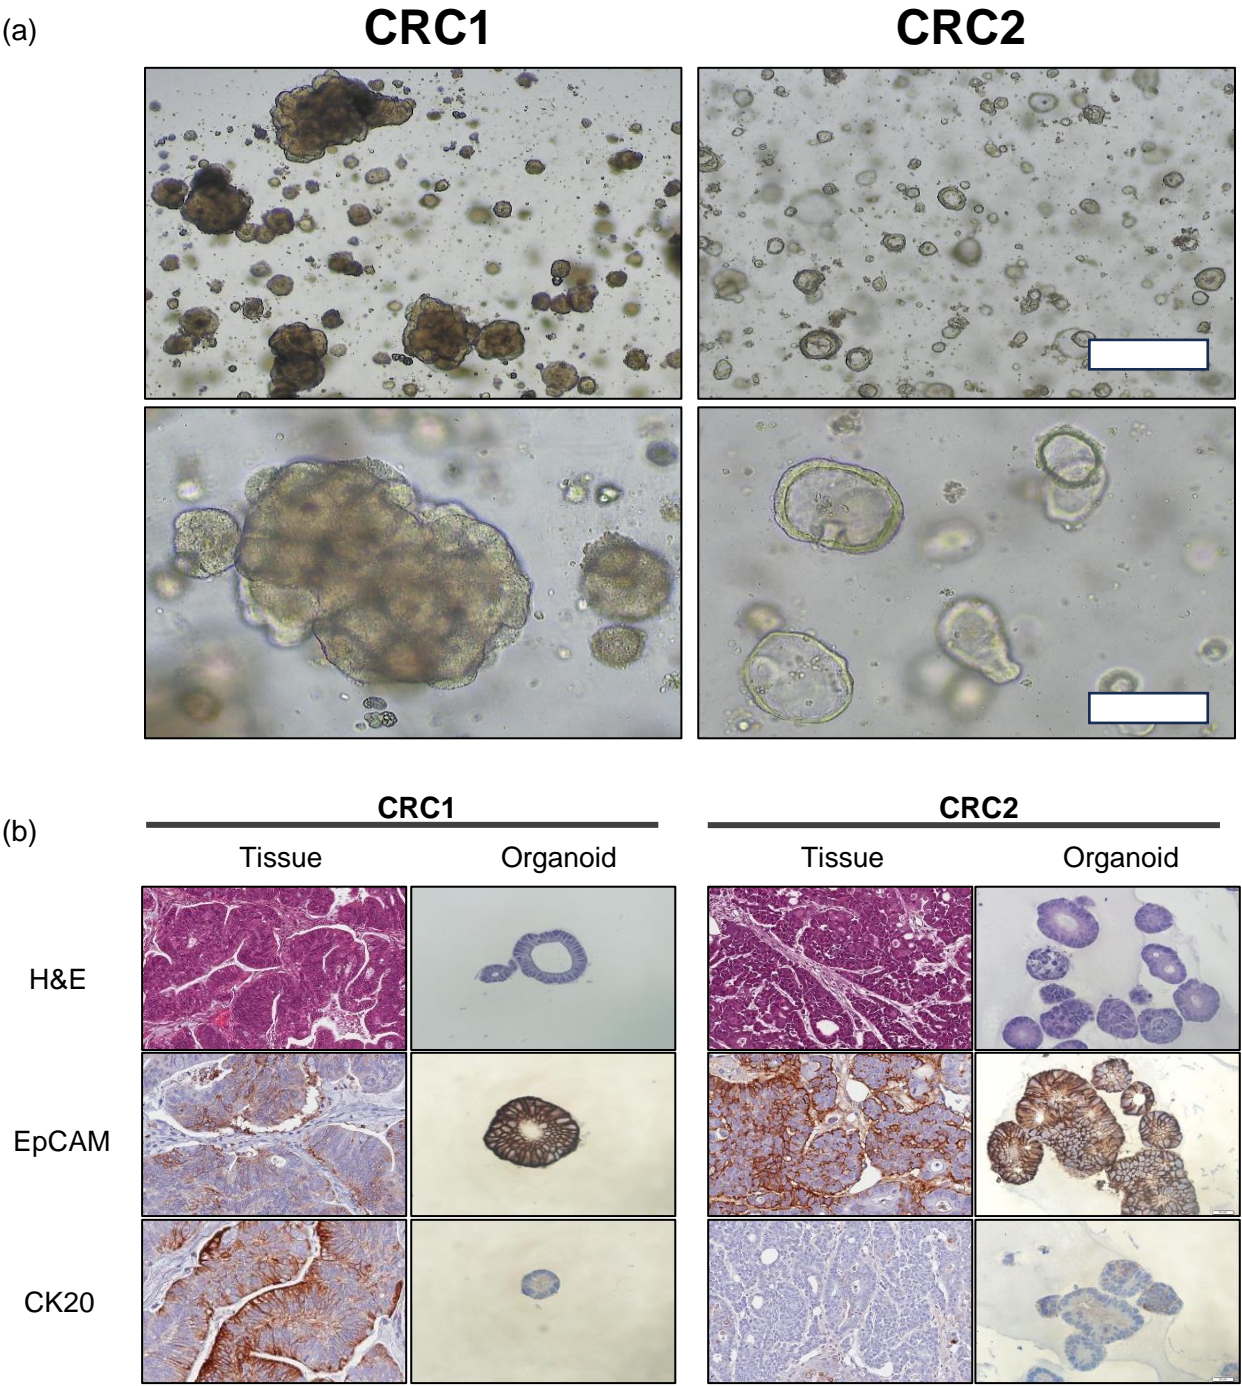

**S. Figure 3. Comparative cellular and staining imaging of CRC1 and CRC2.** (a) CRC1 and CRC2 cell cultures grown in petri dishes. (b) Hematoxylin and eosin stain and immunohistochemical staining of CRC1 and CRC2.

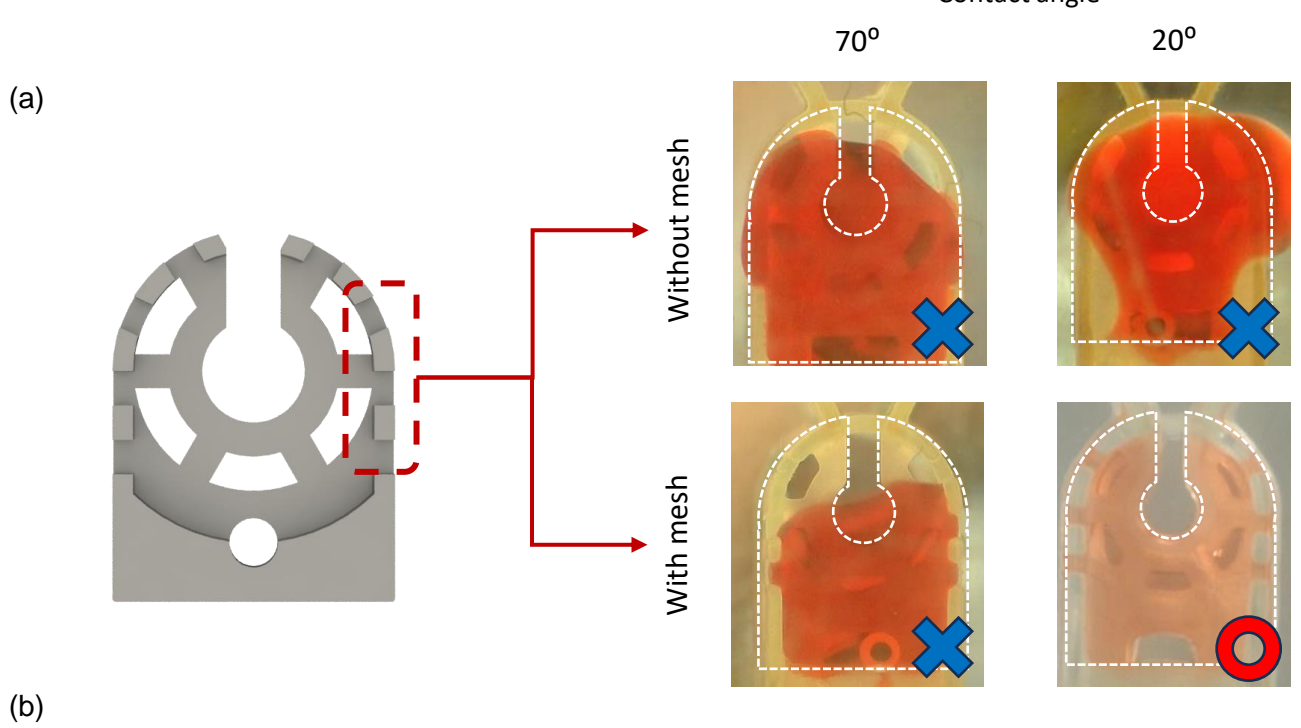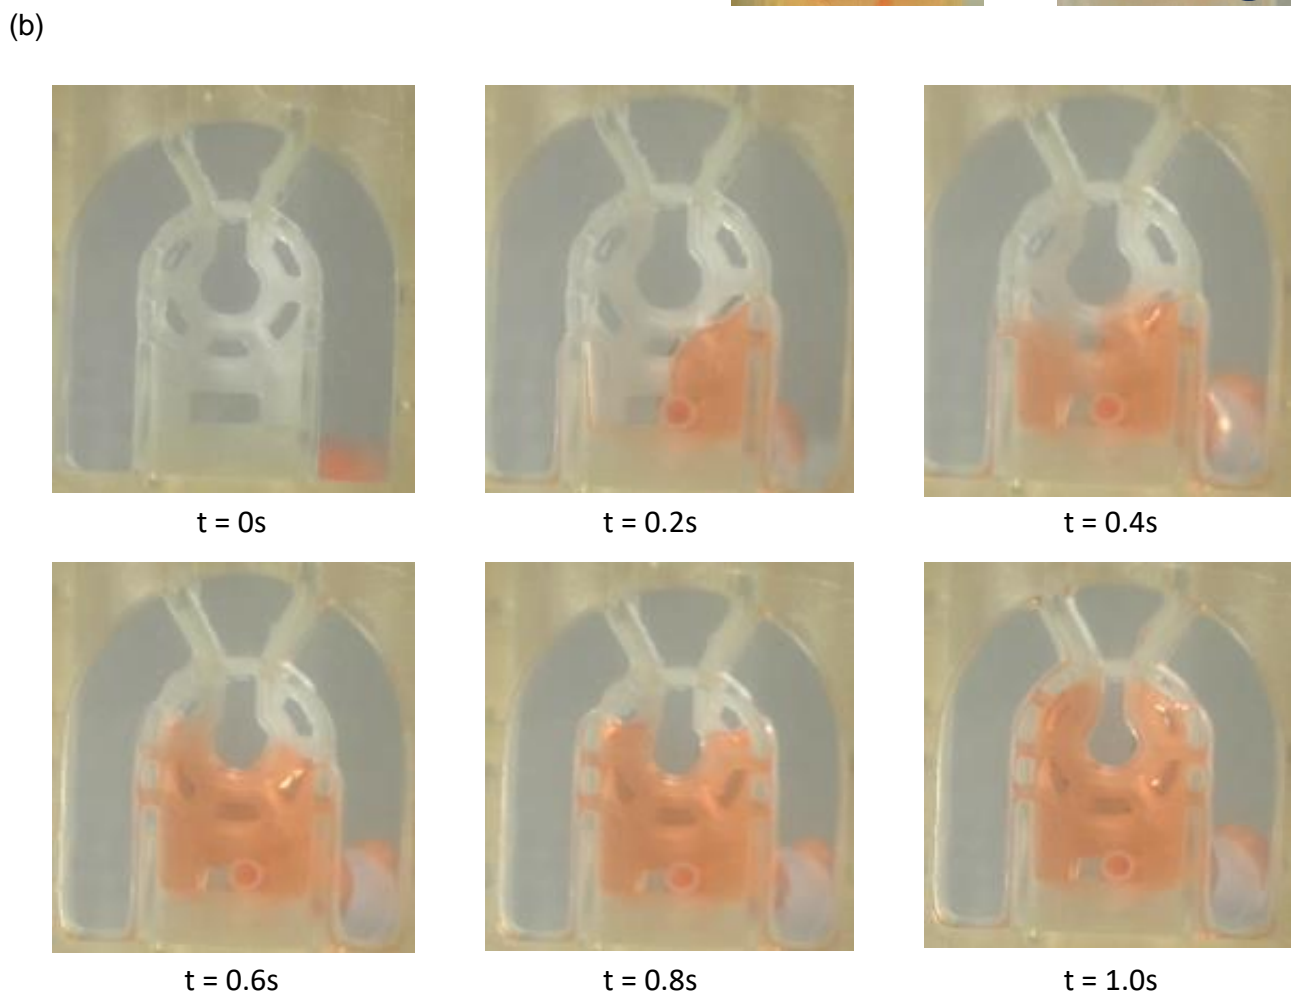

**S. Figure 4. Analysis of patterning variability with and without VT-MAP structural elements and sequential images of stable patterning phases.** (a) Comparison of patterning outcomes based on the presence of mesh elements in VT-MAP and variations in contact angle. The presence of a mesh-assisted structure coupled with a lower contact angle facilitates stable patterning. (b) Time-lapse imagery illustrating the patterning process.
